# Supplementary material for: A high-performance visible laser rewritable black paper
Source: Royal Society of Chemistry journal article supplement (doi:10.1039/d0tc02241a), 2020-01-01
Supplement: d0tc02241a1.pdf [file d0tc02241a1.pdf]

## Supporting Information

### High-performance visible laser rewritable black paper

Zhen Du, Junning Liu, Hanqi Gai, Lan Sheng\* and Sean Xiao-An Zhang

State Key Lab of Supramolecular Structure and Materials, College of  
Chemistry, Jilin University, Changchun, 130012, China.

Tel: 86-431-85153810; Fax: 86-431-85153812

E-mail: shenglan17@jlu.edu.cn

# Table of Contents

|                                      |            |
|--------------------------------------|------------|
| <b>1. Experimental section.....</b>  | <b>S3</b>  |
| <b>2. Synthesis Methods.....</b>     | <b>S5</b>  |
| <b>3. Supplementary Figures.....</b> | <b>S6</b>  |
| <b>4.</b>                            |            |
| <b>References.....</b>               | <b>S10</b> |

## 1. Experimental section

### 1.1. Materials and reagents

Resorcine (99 %), 2-(4-diethylamino-2-hydroxybenzoyl) benzoic acid (98 %), trifluoroacetic acid (TFA, 99 %), methanesulfonic acid ( $\text{CH}_3\text{SO}_3\text{H}$ , 99 %), phenylhydrazine (98 %), 3-Methyl-2-butanone (98 %), 1,3-Propanesultone (98 %) and salicylaldehyde (98 %) were purchased from Energy Chemical (Shanghai, China). Acidochromic dyes and pH-sensitive dye: 2-Anilino-6-dibutylamino-3-methylfluoran (ODB-2) and 3-diethylamino-7-(2'-chlorophenylamino) fluorane (FH 101) were purchased from Deba Chemical (Shanghai, China). Methyl orange (MO) was purchased from Guangfu Fine Chemical Research Institute (Tianjin, China). Anhydrous sodium sulfide ( $\text{Na}_2\text{SO}_4$ ), sodium bicarbonate ( $\text{NaHCO}_3$ ) and hydrochloric acid (HCl) were purchased from Beijing Chemical Works (Beijing, China). Solvents: methanol (MeOH, HPLC) was purchased from Yuwang Group (Shandong, China). Ethyl acetate (EtOAc), ethanol (EtOH), dimethyl sulfoxide (DMSO) and dichloromethane ( $\text{CH}_2\text{Cl}_2$ ) were purchased from Beijing Chemical. Wahaha purified  $\text{H}_2\text{O}$  (Hangzhou, China) was used for all experiments. PEG 20000 (molecular weight: 17,000–22,000) was purchased from Guangfu Fine Chemical Research Institute (Tianjin, China). Cellulose filter paper (Whatman–Xinhua, grade 91, Hangzhou, China) was selected as the paper substrate.

## 1.2. Instruments and characterizations

Absorption spectra were measured using Analytik Jena Specord®210 plus UV/VIS spectrophotometer. Reflective spectra were tested via integrating sphere on Analytik Jena Specord®210 plus UV-VIS spectrophotometer, using barium sulfate ( $\text{BaSO}_4$ ) as background, slit was 2 cm. CIE  $L^*$ ,  $a^*$ ,  $b^*$  was measured by X-rite spectrodensitometer.  $^1\text{H}$  NMR (400, 500 MHz) spectra was recorded on a Bruker AVANCE400 at room temperature. Blue light source for imaging with a mask here used was Wota F25 fishing lamp (Ningbo, China). Laser automatic printing was realized by laser marking machine Xiai XYC-UV / MGL, which was purchased from Changchun New Industries Optoelectronics Tech. Co. (Changchun, China). Photographs were captured using the Nikon D7100 camera.

## 1.3. Preparation of black VLRP

The preparation process of black **VLRP** referred to our previous work<sup>S1</sup>. Filter paper was firstly coated with a layer of 10 wt% PEG20000 aqueous solution and then dried by heating at 80 °C. Later, it was soaked into a MeOH solution of the acidochromic dyes (5 mM ODB-2 & 0.7 mM Rhodol), P-1 (11.4 mM) and 15 wt% PEG20000 mixture.

## 2. Synthesis Methods

### 2.1. Synthesis of P-1

Compound P-1 was reported previously<sup>S1,S2</sup>. <sup>1</sup>H NMR (500 MHz, DMSO-d<sub>6</sub>) δ 11.03 (s, 1H), 8.60 (d, *J* = 16.3 Hz, 1H), 8.28 (d, *J* = 7.8 Hz, 1H), 8.03 (d, *J* = 7.6 Hz, 1H), 7.94-7.81 (m, 2H), 7.62 (m, 2H), 7.48 (t, *J* = 7.5 Hz, 1H), 7.04 (d, *J* = 8.2 Hz, 1H), 6.99 (t, *J* = 7.5 Hz, 1H), 4.81 (t, *J* = 7.3, 2H), 2.64 (t, *J* = 6.0 Hz, 2H), 2.18 (m, 2H), 1.77 (s, 6H).

### 2.2. Synthesis of Rhodol

The synthesis of Rhodol was according to the literature<sup>S3</sup>. <sup>1</sup>H NMR (400 MHz, DMSO-d<sub>6</sub>) δ 10.08 (s, 1H), 7.97 (d, *J* = 7.5 Hz, 1H), 7.78 (t, *J* = 7.4 Hz, 1H), 7.70 (t, *J* = 7.4 Hz, 1H), 7.26 (d, *J* = 7.6 Hz, 1H), 6.66 (s, 1H), 6.52 (s, 2H), 6.46 (s, 1H), 6.44 (s, 2H), 3.37-3.32 (m, 4H), 1.09 (t, *J* = 6.9 Hz, 6H).

### 3. Supplementary Figures

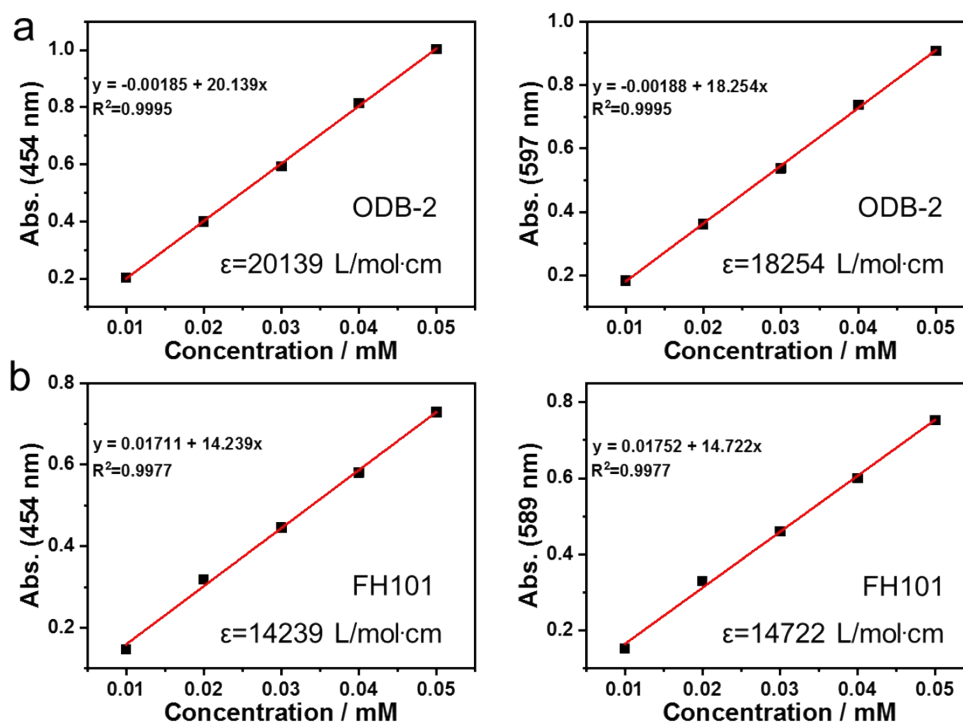

**Fig. S1** Plots of the absorbance at two complementary absorption peaks of (a) ODB-2 and (b) FH101 after adding excessive  $\text{CH}_3\text{SO}_3\text{H}$  versus increasing concentration and thus its molar absorption coefficients ( $\epsilon$ ) at two complementary absorption peaks were obtained respectively according to LambertBeer law.

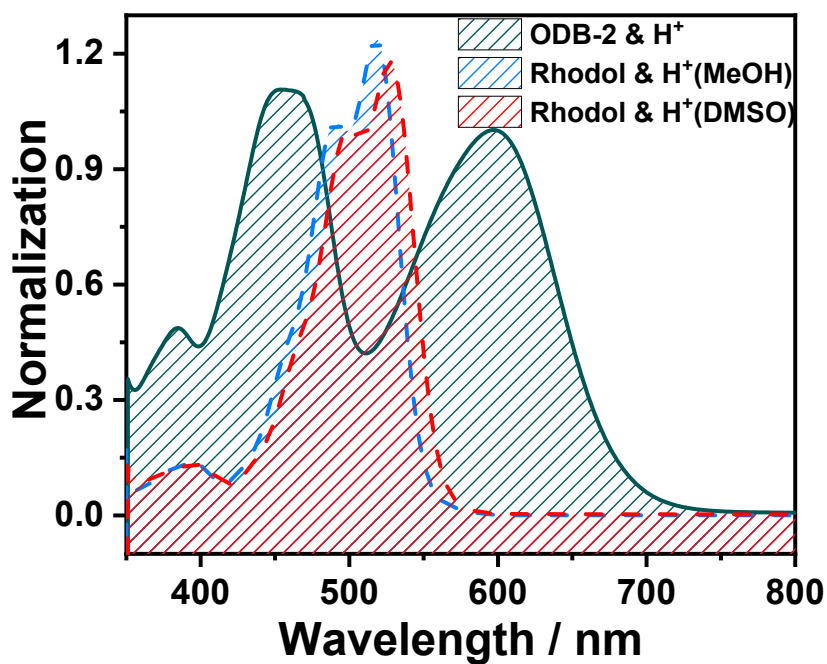

**Fig. S2** Normalized UV-vis spectra of Rhodol & H<sup>+</sup> (MeOH, DMSO) and ODB-2 & H<sup>+</sup> (MeOH).

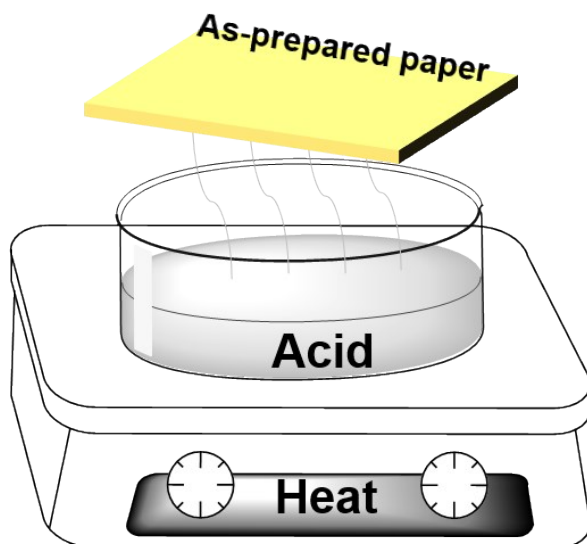

**Fig. S3** Schematic illustrations of adding acid in as-prepared paper (The as-prepared paper was test after enough time fumigation by acid, and the paper has the darkest colour and colour-changed no longer with fumigation time increased).

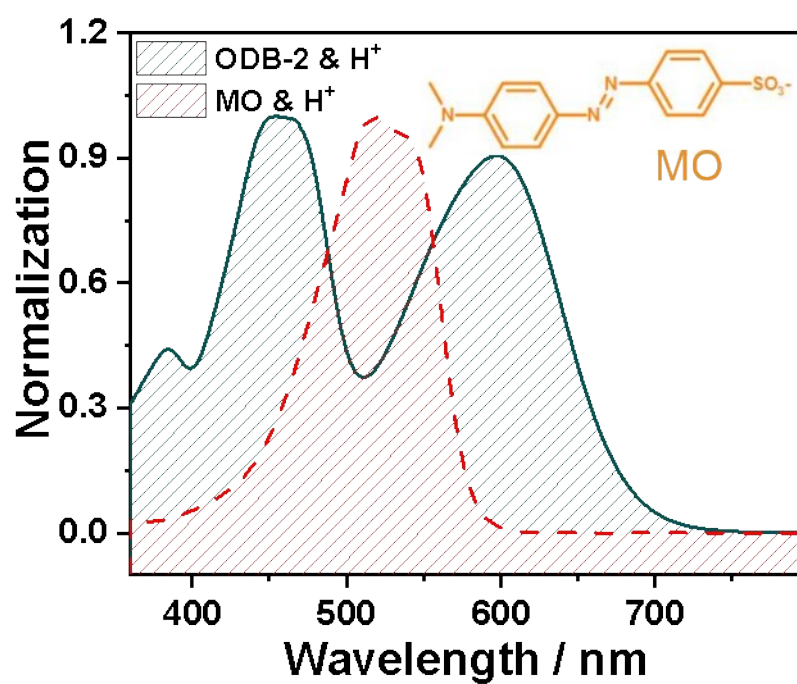

**Fig. S4** Normalized UV-vis spectra of MO & H<sup>+</sup> and ODB-2 & H<sup>+</sup> in MeOH.



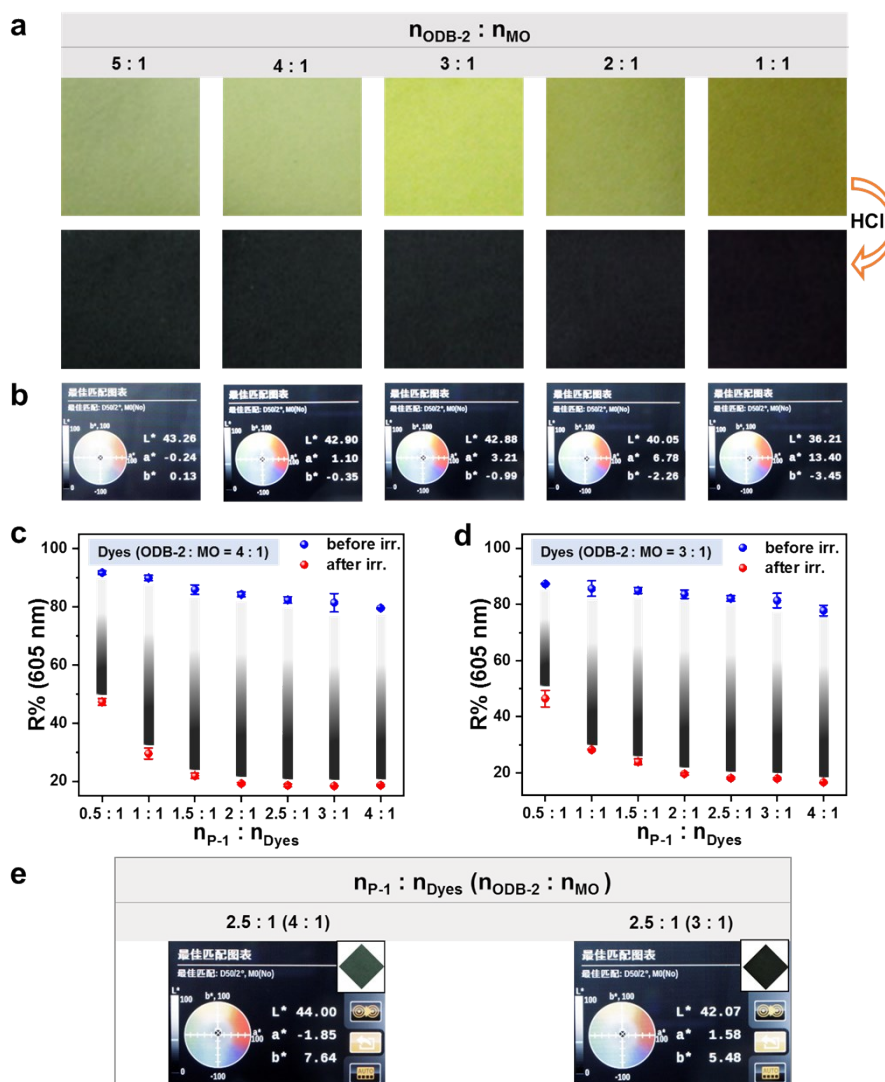

**Fig. S5** (a) Photographs of papers loaded with different ratios of MO to ODB-2 (2.5 mM) before and after addition HCl. (b)  $L^*$ ,  $a^*$ ,  $b^*$  measured by spectrodensitometer and photographs of papers loaded with different ratios of MO to ODB-2 (2.5 mM) after addition HCl. (c, d) Reflectance change at 605 nm of dyes & P-1 based paper with different ratio of P-1 and dyes before and after irradiation, which has different ratio of ODB-2 to MO: c) 4 / 1; d) 3 / 1. (e)  $L^*$ ,  $a^*$ ,  $b^*$  measured by spectrodensitometer and photographs of P-1 & dyes ( $n/n$  2.5/1) based paper after irradiation with different ratio of ODB-2 to MO: 4/1 (left);

3/1 (right).

#### 4. References

- S1 T. Zhang, L. Sheng, J. Liu, L. Ju, J. Li, Z. Du, W. Zhang, M. Li, S. X.-A. Zhang, *Adv. Funct. Mater.* 2018, **28**, 201705532.
- S2 Z. Shi, P. Peng, D. Strohecker & Y. Liao, *J. Am. Chem. Soc.* 2011, **133**, 14699.
- S3 X. Wang, W. Li, W. Li, C. Gu, H. Zheng, Y. Wang, S. X.-A. Zhang, *Chem. Commun.* 2017, **53**, 11209.
